# Supplementary material for: Durable, flexible, superhydrophobic and blood-repelling surfaces for use in medical blood pumps
Source: Royal Society of Chemistry journal article supplement (doi:10.1039/c8tb01547c), 2018-01-01
Supplement: c8tb01547c1.pdf [file c8tb01547c1.pdf]

## Supporting Information

### Durable, Flexible, Superhydrophobic and Blood-Repelling Surface for Use in Medical Blood Pumps

*Zhe Li<sup>1</sup>, Ba Loc Nguyen<sup>1</sup>, Yi Chih Cheng<sup>1</sup>, Junmin Xue<sup>2</sup>, Graeme MacLaren<sup>3,4</sup>, Choon Hwai Yap<sup>1\*</sup>*

<sup>1</sup>Department of Biomedical Engineering, National University of Singapore, Singapore.

Email: [bieyapc@nus.edu.sg](mailto:bieyapc@nus.edu.sg)

<sup>2</sup>Department of Material Science and Engineering, National University of Singapore,  
Singapore

<sup>3</sup>Department of Surgery, Yong Loo Lin School of Medicine, National University of  
Singapore, Singapore

<sup>4</sup>Department of Cardiac, Thoracic and Vascular Surgery, National University Heart Centre,  
Singapore

**PDMS sample:** PDMS in this study refers to Sylgard 184 mixed with the curing agent at a weight ratio of 10:1. The mixed PDMS was degassed in the vacuum chamber. Thin PDMS membrane was prepared on a glass substrate and cured at 100°C for 2 hours.

**Dip-coated sample:** 0.6 g hydrophobic SiO<sub>2</sub> nano particles and 1.0 g PDMS were mixed in 10 ml acetone following similar protocols in the literature.<sup>1, 2</sup> A uniform suspension was acquired by placing the mixture under ultrasonication for 20 minutes and magnetic stirring for 5 minutes. Thin slices of PDMS membrane were dipped into the suspension, and withdrawn slowly and vertically. Dip-coated samples were baked at 100 °C for 30 hours to cure the PDMS & SiO<sub>2</sub> layer.

**Spray-coated sample:** Spray-coating samples were prepared using the same suspension solution as the dip coating. The suspension was sprayed onto the PDMS membrane using a spray gun (nozzle diameter: 0.5 mm; distance between the gun and PDMS membrane: 15 cm; air pressure: 0.4 MPa).<sup>3</sup> Spray-coated samples were cured at 100 °C for 30 hours before testing.

**Press-in-mold sample:** Following the reported method in the literature,<sup>4, 5</sup> a control item was prepared using the press-in-mold method. Briefly, 0.6 g HP-SiO<sub>2</sub> particles were added to 1.0 g PDMS liquid; the sticky and pastry mixture was manually stirred to mix SiO<sub>2</sub> and PDMS. The mixture was fed into a mold cavity and cured at 100 °C under a clamping pressure of 10 MPa.

**Sand-casting SHP sample with F-PDMS:** Trichloro(1H,1H,2H,2H-perfluorooctyl)silane (FDTS) was firstly mixed with PDMS at a mass ratio of 4% as the fluorinated-PDMS (F-PDMS).<sup>6</sup> After degasing, the mixture was pour onto the prepared SiO<sub>2</sub> mold, and cured at

100°C for 30 minutes; after curing, PDMS was peeled from the mold to obtain a casted F-PDMS SHP sample.

**Porosity:** Porosity of the SiO<sub>2</sub> mold prepared in this study was measured to be 49.69 % ±1.47% (averaged over five measurements). Porosity can be estimated using the following equation.<sup>7</sup>

$$\text{Porosity}(\%) = \frac{V_{\text{mold}} - (V_{\text{PDMS}} + V_{\text{SiO}_2})}{V_{\text{mold}}} \times 100 \quad (1)$$

where,  $V_{\text{mold}}$  is the measured volume of a prepared SiO<sub>2</sub> & PDMS composite mold sample,  $V_{\text{PDMS}}$  is the volume of the PDMS, and  $V_{\text{SiO}_2}$  is the volume of SiO<sub>2</sub>.

$V_{\text{PDMS}}$  and  $V_{\text{SiO}_2}$  are calculated using the following equations.

$$V_{\text{PDMS}} = \frac{m_{\text{mold}}}{(1 + \delta) \cdot \rho_{\text{PDMS}}} \quad (2)$$

$$V_{\text{SiO}_2} = \frac{\delta \cdot m_{\text{mold}}}{(1 + \delta) \cdot \rho_{\text{SiO}_2}} \quad (3)$$

where,  $m_{\text{mold}}$  is the measured mass of a SiO<sub>2</sub> & PDMS composite mold,  $\rho_{\text{PDMS}}$  is the PDMS density (0.965 g/cm<sup>3</sup>),  $\rho_{\text{SiO}_2}$  is the SiO<sub>2</sub> density (2.65 g/cm<sup>3</sup>),  $\delta$  is the mass ratio (0.6 in this study) between SiO<sub>2</sub> and PDMS when preparing the SiO<sub>2</sub> mold.

**Blood anticoagulant:** As for the anticoagulant, it was prepared by mixing 1.975g sodium citrate tribasic dehydrate (Sigma Aldrich C8532) and 1g HEPES (Sigma Aldrich H3375) in 50ml deionised water.<sup>8</sup> The anticoagulant was mixed with the blood at a volume ratio of 1:10 to prevent blood from clogging. Blood test was performed in four hours after blood collection.

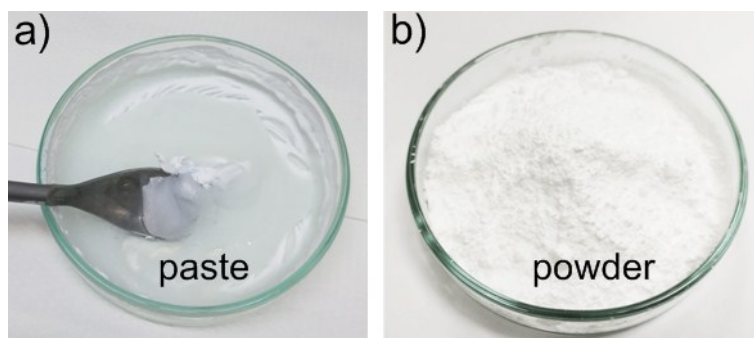

**Figure S1.** a) The HP-SiO<sub>2</sub> & PDMS composite paste before drying, and b) the HP-SiO<sub>2</sub> & PDMS composite powder after drying.

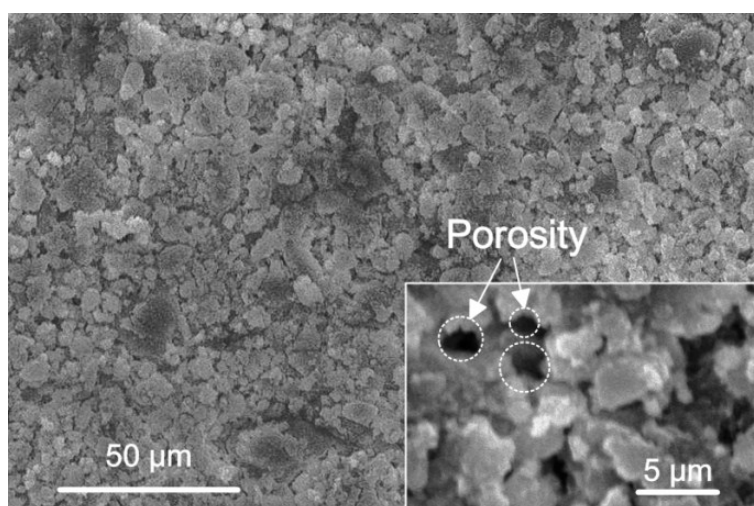

**Figure S2.** SEM image of the prepared SiO<sub>2</sub> mold, showing micro-particles and micro-porosities on the prepared SiO<sub>2</sub> mold.

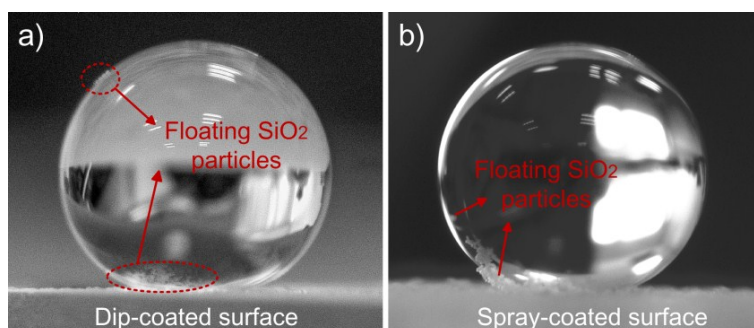

**Figure S3.** Free SiO<sub>2</sub> particles floating around a droplet a) on the dip-coated surface, and b) the spray-coated surface.

## References

1. K. Li, X. Zeng, H. Li, X. Lai, C. Ye and H. Xie, *Applied Surface Science*, 2013, **279**, 458-463.
2. D. Zhi, Y. Lu, S. Sathasivam, I. P. Parkin and X. Zhang, *Journal of Materials Chemistry A*, 2017, **5**, 10622-10631.
3. X. Zhang, Y. Guo, P. Zhang, Z. Wu and Z. Zhang, *ACS applied materials & interfaces*, 2012, **4**, 1742-1746.
4. X. Zhang, W. Zhu, G. He, P. Zhang, Z. Zhang and I. P. Parkin, *Journal of Materials Chemistry A*, 2016, **4**, 14180-14186.
5. X. Zhang, D. Zhi, L. Sun, Y. Zhao, M. K. Tiwari, C. J. Carmalt, I. P. Parkin and Y. Lu, *Journal of Materials Chemistry A*, 2018, DOI: 10.1039/C7TA08895G.
6. Z. Pan, H. Shahsavan, W. Zhang, F. K. Yang and B. Zhao, *Applied Surface Science*, 2015, **324**, 612-620.
7. F. Chen, Y. Lu, X. Liu, J. Song, G. He, M. K. Tiwari, C. J. Carmalt and I. P. Parkin, *Advanced Functional Materials*, 2017, **27**, 1702926.
8. C. Q. Lai, J. C. W. Shen, W. C. W. Cheng and C. H. Yap, *RSC Advances*, 2016, **6**, 62451-62459.
